# Supplementary material
Source: publisher figshare collection journal article supplement (https://acs.figshare.com/ndownloader/files/25566542)
Supplement: Supplementary file 1 [file 25566542]

# Supporting Information

## Porosity Effects on the Ordering and Stability of Self-Assembled Monolayers on Nanoporous Gold

*Dipna A. Patel, Robert B. Chevalier, Andrew M. Weller, Christopher C. Shakespeare, Edward J. Soares, Elizabeth C. Landis\**

Department of Chemistry, College of the Holy Cross, 1 College St Box C, Worcester, MA 01610

Department of Mathematics and Computer Science, College of the Holy Cross, 1 College St.,  
Worcester, MA 01610

AUTHOR EMAIL ADDRESS: [elandis@holycross.edu](mailto:elandis@holycross.edu), (508)793-2662

## 1. X-ray photoelectron spectroscopy of molecular layers on nanoporous gold

X-ray photoelectron spectroscopy (XPS) was collected on a Thermo Scientific K-Alpha XPS using monochromatic Al K $\alpha$  X-rays at 1.4866 keV with a 400  $\mu$ m spot size. All spectra were collected with a flood gun to minimize sample charging. Survey spectra were collected using a 1 eV/step, 10 ms dwell time, and 200 eV pass energy. High-resolution scans were collected using a 0.1 eV/step, 50 ms dwell time, and 50 eV pass energy. Spectra were collected using 10 scans for carbon, 40 scans for iron, 30 scans for sulfur, and 3 scans for gold and were corrected using sensitivity factors. Peaks were fit with the Thermo Advantage program using a Smart background correction. All XPS measurements were collected the day after samples were removed from solution. Control experiments demonstrated that the day in air did not cause a measurable change in the XPS spectra.

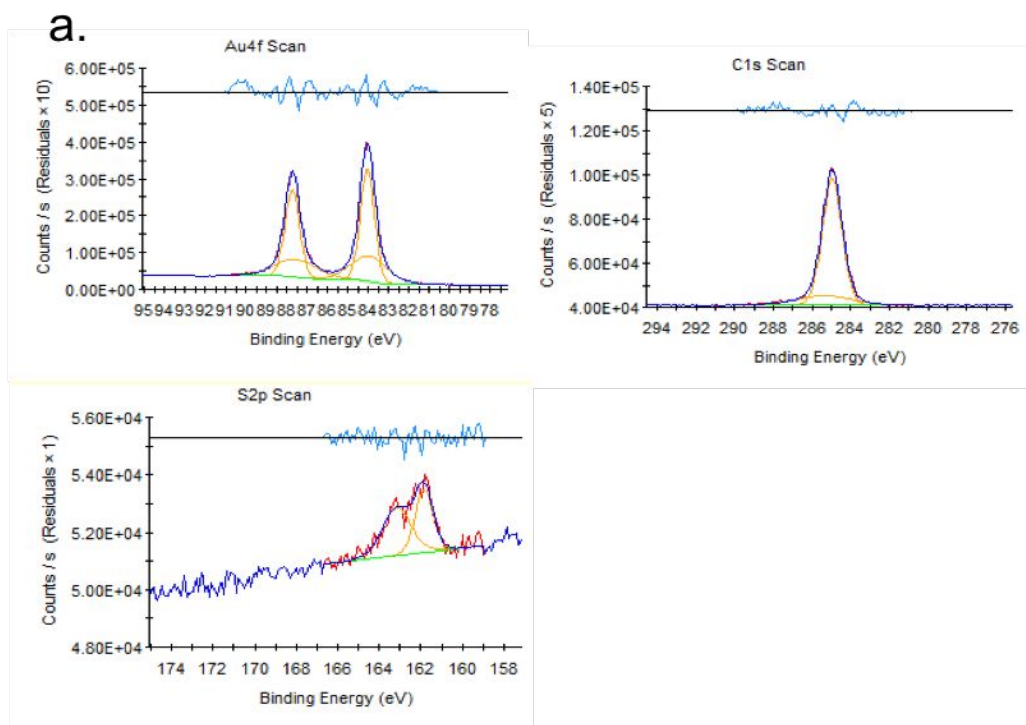

b.

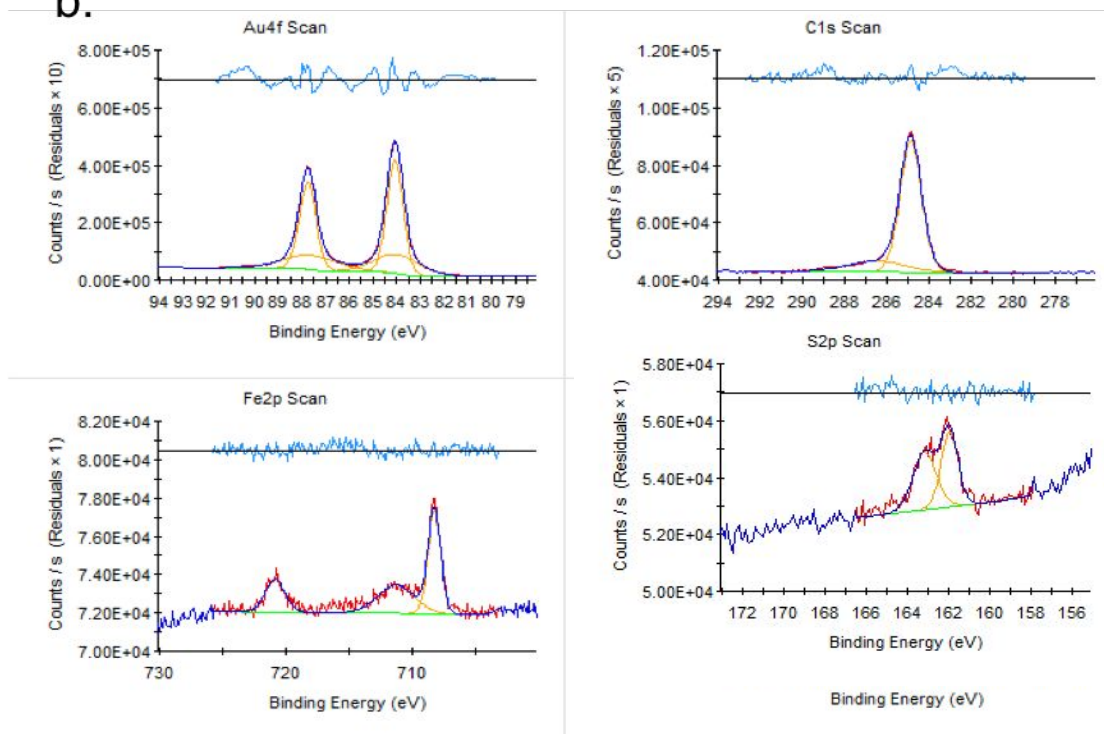

**Figure S1.** X-Ray photoelectron spectroscopy of nanoporous gold samples functionalized for 7 days in solutions of **a.** 1 mM 1-octadecanethiol, **b.**  $\chi_{Fc}^{soln} = 0.40$ . Samples were rinsed in ethanol for 30 minutes following functionalization.

## 2. Pb-UPD data quantification

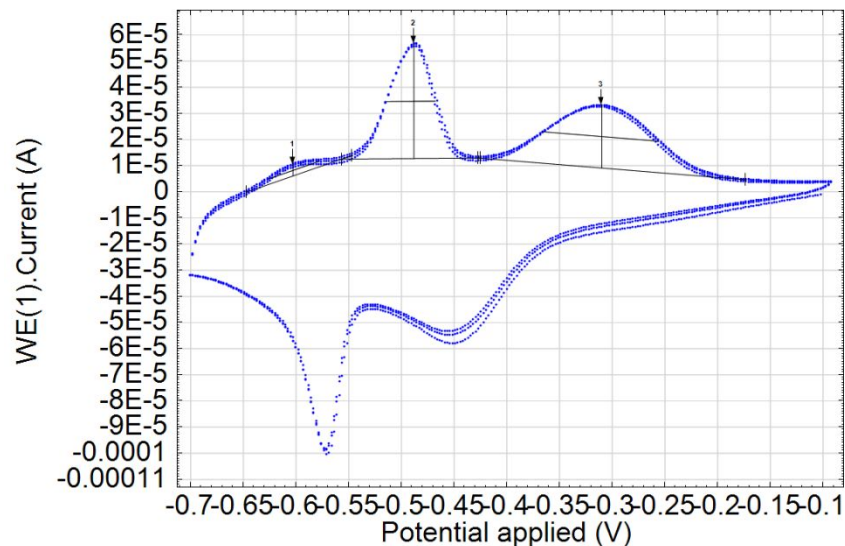

**Figure S2.** Lead underpotential deposition (Pb-UPD) example quantification, performed using NOVA 1.11 software with a linear curve cursor baseline mode. Peaks were initially detected using the automatic peak search mode. Quantification was performed manually using the second sweep for each cyclic voltammogram.

## 3. Stability of ferrocene on nanoporous gold

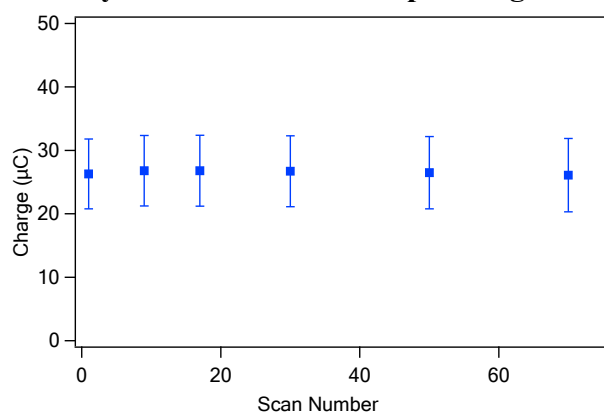

**Figure S3.** Average oxidation peak area for repeated cyclic voltammograms of  $\text{FcC}_{11}\text{SH}$  on nanoporous gold dealloyed for 24 hours, plotted against the cyclic voltammetry scan number. Cyclic voltammograms were collected at 250 mV/s in 1.00M  $\text{NaClO}_4$ . Peak areas were measured using NOVA 1.11 software.

#### 4. Nanoporous gold surface area measurements

The surface area of nanoporous gold substrates was measured using electrochemical oxidation and reduction of the gold oxide peak. Cyclic voltammograms were collected in a 0.50 M H<sub>2</sub>SO<sub>4</sub> solution from 0 to 1.5V at 100 mV/s. Integration of the reduction peak was used to determine the charge required to strip the Au oxide layer, and the conversion factor of 390  $\mu\text{C}/\text{cm}^2$  was used to calculate the surface area.<sup>1</sup>

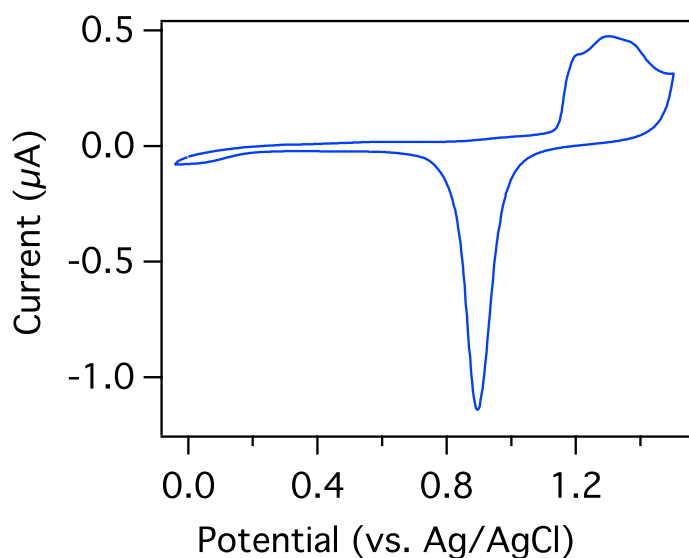

**Figure S4.** Cyclic voltammogram of gold oxide reduction, collected on nanoporous gold dealloyed for 48 hours in 0.50 M H<sub>2</sub>SO<sub>4</sub> at 100 mV/s.

## 5. Sample cyclic voltammetry curve fits

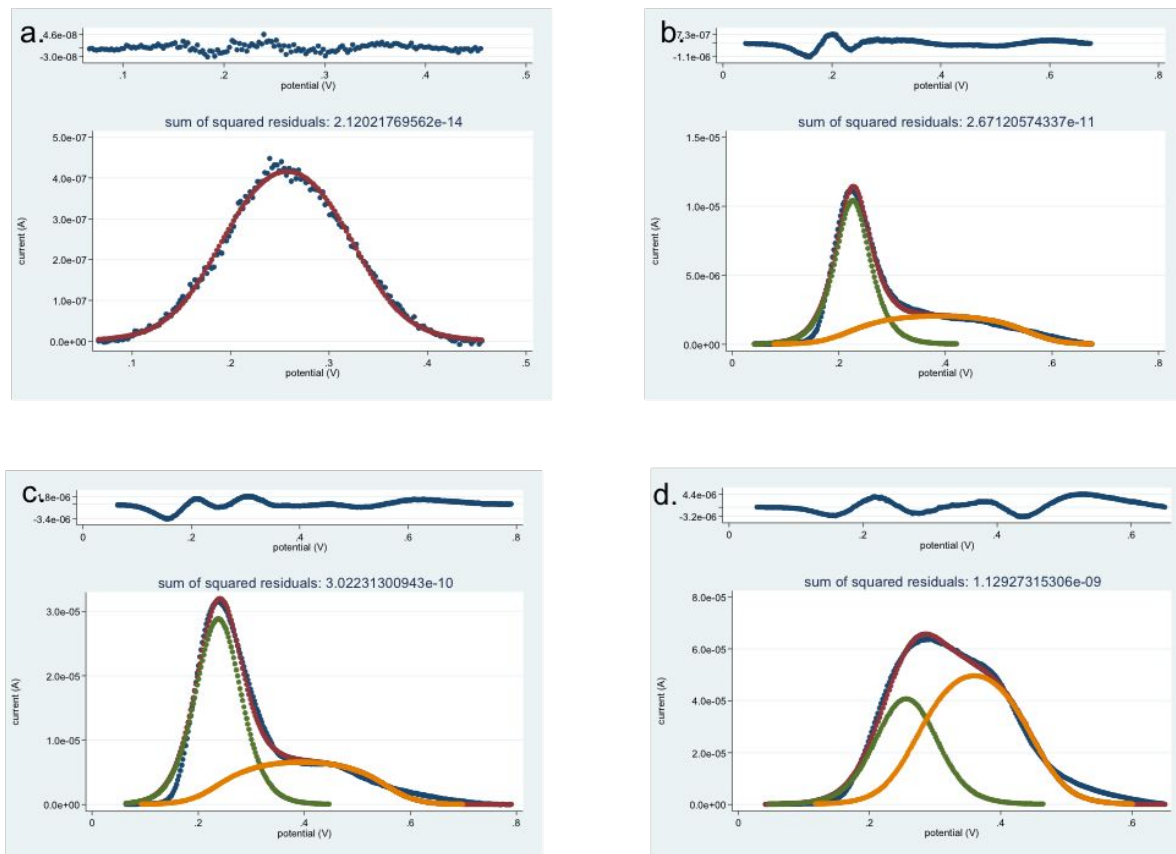

**Figure S5.** Sample curve fits for nanoporous gold dealloyed for 2 hours and functionalized in mixtures of  $\text{FcC}_{11}\text{SH}$  and  $\text{C}_{11}\text{SH}$  with (a)  $\chi_{\text{Fc}}^{\text{soln}} = 0.10$  (b)  $\chi_{\text{Fc}}^{\text{soln}} = 0.40$  (c)  $\chi_{\text{Fc}}^{\text{soln}} = 0.60$  (d)  $\chi_{\text{Fc}}^{\text{soln}} = 0.80$ . Peaks were fit with Frumkin isotherms following the work of Laviron.<sup>2</sup>

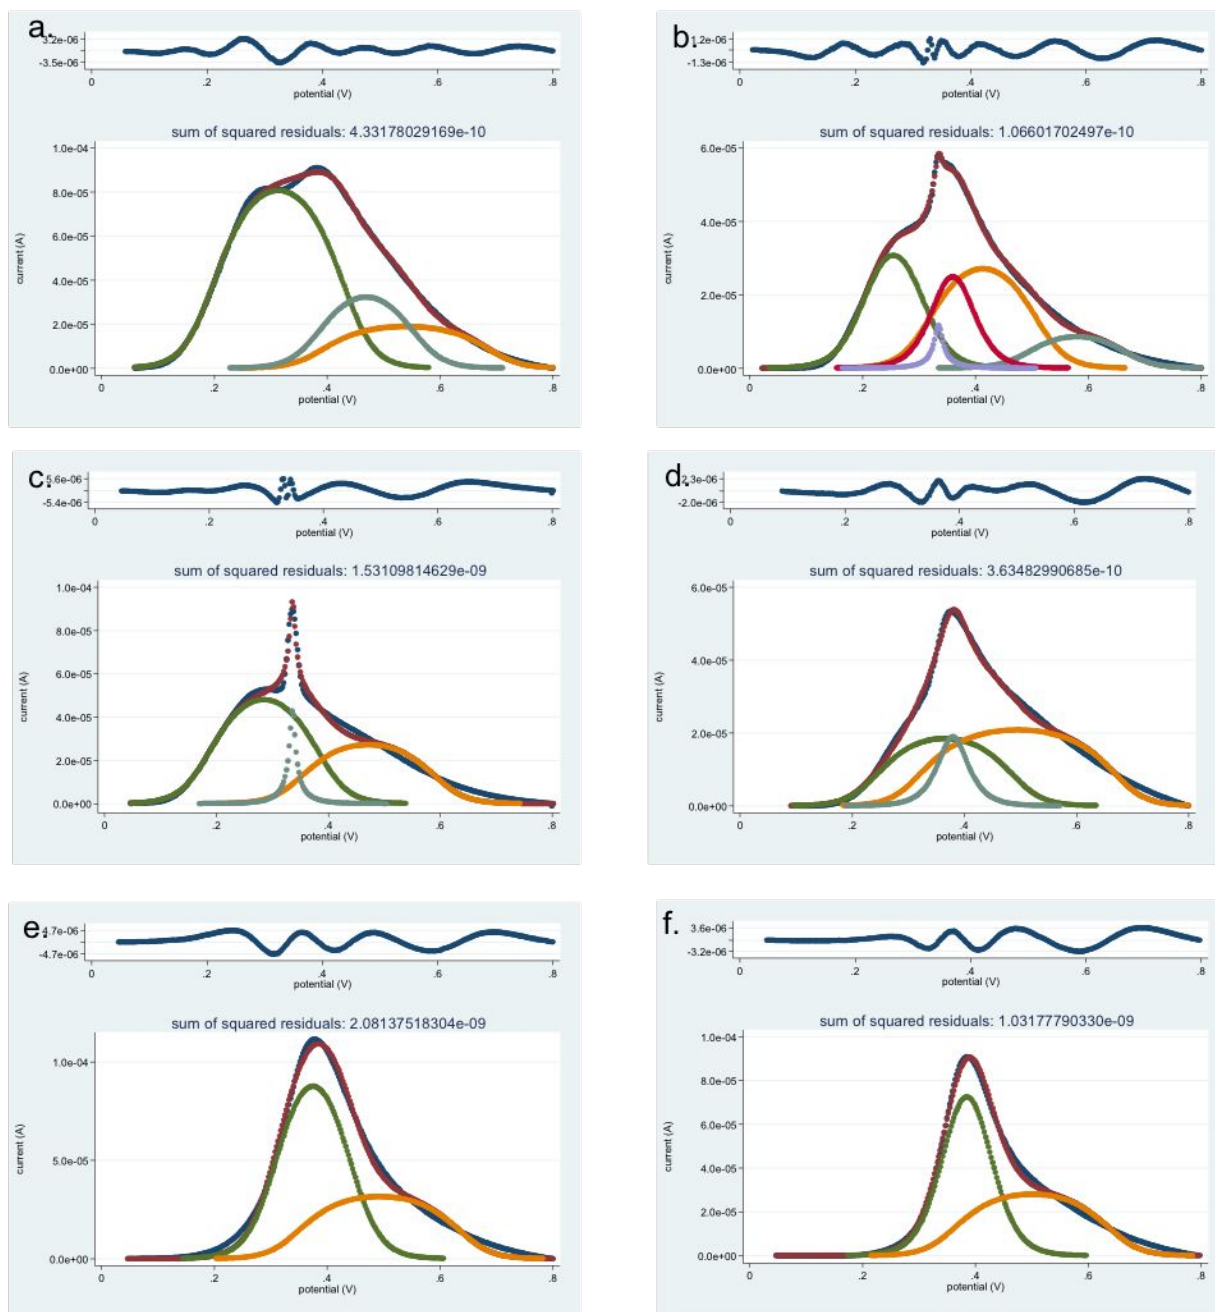

**Figure S6** Samples curve fits for nanoporous gold functionalized in 1 mM FcC<sub>11</sub>SH for 7 days. Nanoporous gold samples were dealloyed for (a) 30 minutes (b) 2 hours (c) 8 hours (d) 12 hours (e) 24 hours (f) 48 hours. Peaks were fit with with Frumkin isotherms following the work of Laviron.<sup>2</sup>

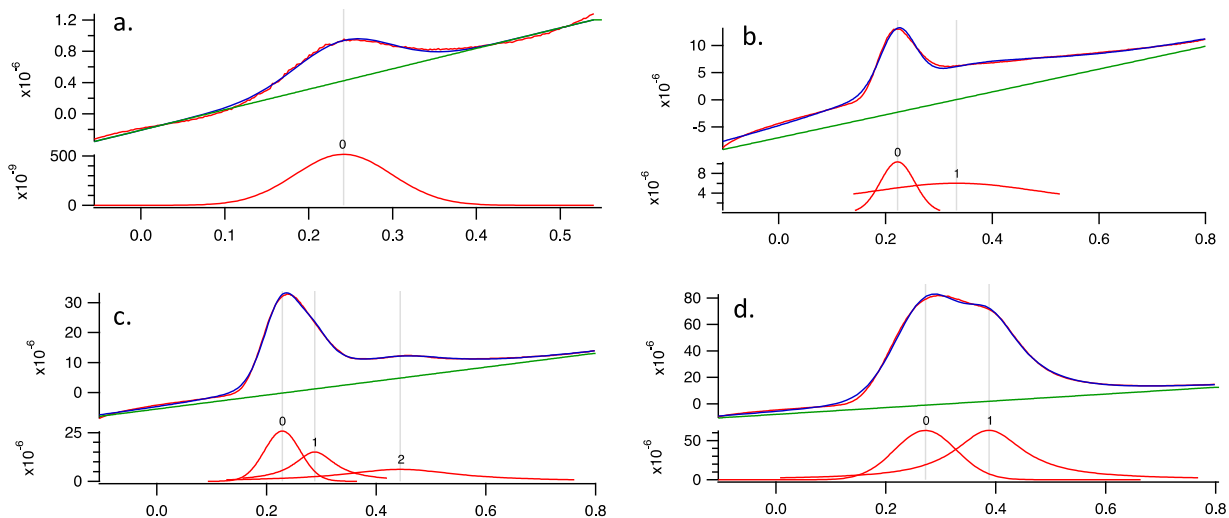

**Figure S7.** Sample curve fits for nanoporous gold dealloyed for 2 hours and functionalized in mixtures of FcC<sub>11</sub>SH and C<sub>11</sub>SH with (a)  $\chi_{Fc}^{soln} = 0.10$  (b)  $\chi_{Fc}^{soln} = 0.40$  (c)  $\chi_{Fc}^{soln} = 0.60$  (d)  $\chi_{Fc}^{soln} = 0.80$ . Peaks were fit with a combination of Gaussian and Lorentzian functions following the procedure described by Lee et. al. and fits were used to calculate peak areas and ferrocene coverage.<sup>3</sup>

**Table S1.** Surface density of FcC<sub>11</sub>SH molecules, reported in moles Fc/cm<sup>2</sup> and calculated for each solution mole fraction of FcC<sub>11</sub>SH and nanoporous gold dealloying time.

| Dealloying time | $\chi_{Fc}^{soln} = 0.1$ | $\chi_{Fc}^{soln} = 0.4$ | $\chi_{Fc}^{soln} = 0.6$ | $\chi_{Fc}^{soln} = 0.8$ | $\chi_{Fc}^{soln} = 1.0$ |
|-----------------|--------------------------|--------------------------|--------------------------|--------------------------|--------------------------|
| 0.5 h           | $5.1 \times 10^{-13}$    | $4.7 \times 10^{-11}$    | $9.7 \times 10^{-11}$    | $3.6 \times 10^{-10}$    | $5.6 \times 10^{-10}$    |
| 2 h             | $9.6 \times 10^{-13}$    | $5.9 \times 10^{-11}$    | $1.0 \times 10^{-10}$    | $3.4 \times 10^{-10}$    | $5.6 \times 10^{-10}$    |
| 8 h             | $1.2 \times 10^{-12}$    | $5.7 \times 10^{-11}$    | $1.1 \times 10^{-10}$    | $3.1 \times 10^{-10}$    | $5.2 \times 10^{-10}$    |
| 48 h            | $1.3 \times 10^{-12}$    | $6.1 \times 10^{-11}$    | $1.1 \times 10^{-10}$    | $3.5 \times 10^{-10}$    | $5.8 \times 10^{-10}$    |



## References

- (1) Trasatti, S.; Petrii, O. A. *Pure Appl. Chem.* **1991**, 63 (5), 711–734.
- (2) Laviron, E. *Electroanal. Chem. Interfacial Electrochem.* **1974**, 52, 395–402.
- (3) Lee, L. Y. S.; Sutherland, T. C.; Rucareanu, S.; Lennox, R. B. *Langmuir* **2006**, 22 (9), 4438–4444.
